# Supplementary material for: Mutualistic Interactions between Dinoflagellates and Pigmented Bacteria Mitigate Environmental Stress
Source: PubMed Central journal article supplement (PMC9927270; doi:10.1128/spectrum.02464-22), 2023-01-18
Supplement: spectrum.02464-22-s0001.pdf [file spectrum.02464-22-s0001.pdf]

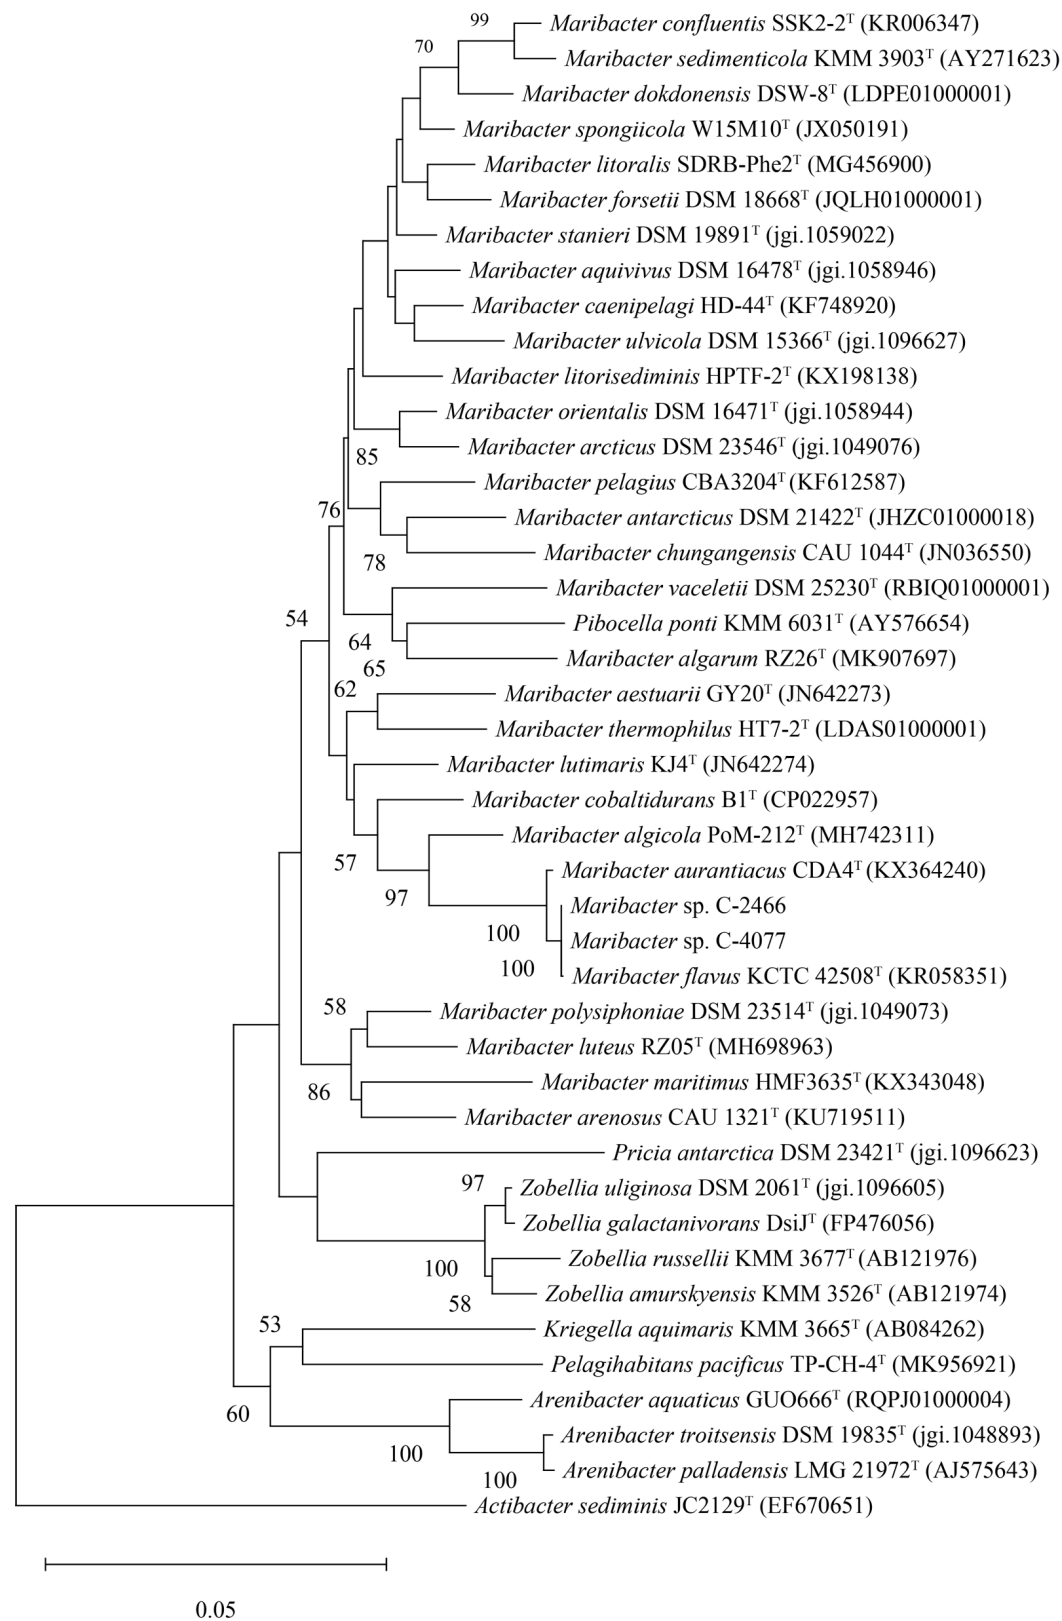

**Figure S1. Neighbor-joining tree based on 16S rRNA gene sequences showing phylogenetic relationships of C-4077 and C-2466, and related taxa in the family Flavobacteriaceae.**

Numbers on branches represent bootstrap values (1,000 replications). Bootstrap values >50% are indicated at nodes. Bar, 0.05 substitutions per nucleotide position. The sequence of *Actibacter sediminis* JC2129<sup>T</sup> was used as the outgroup.

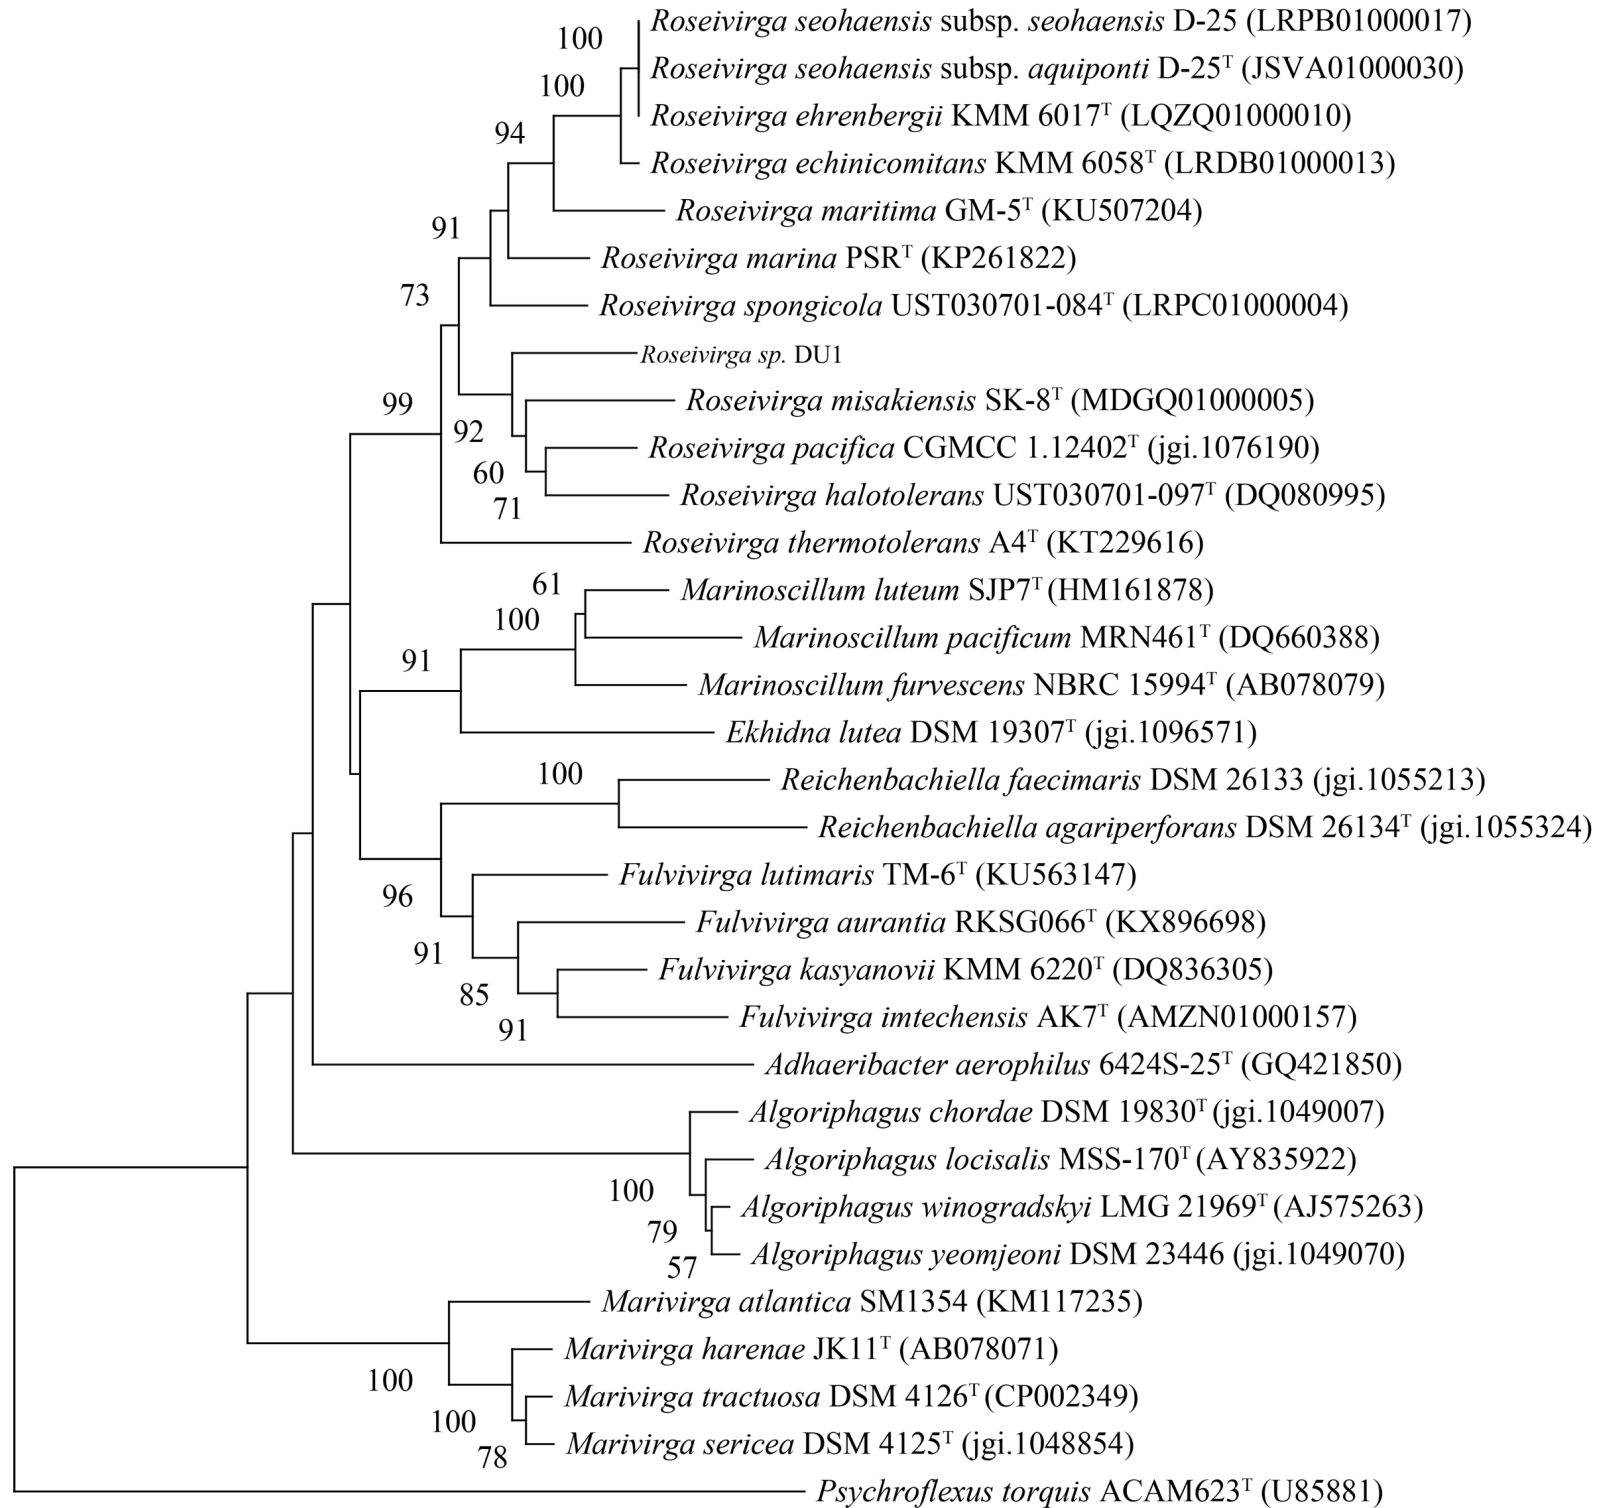

0.05

**Figure S2. Neighbor-joining tree based on 16S rRNA gene sequences showing phylogenetic relationships of DU1 and related taxa in the family Roseivirgaceae.**

Numbers on branches represent bootstrap values (1,000 replications). Bootstrap values >50% are indicated at nodes. Bar, 0.05 substitutions per nucleotide position. The sequence of *Psychroflexus torquis* ACAM623<sup>T</sup> was used as the outgroup.

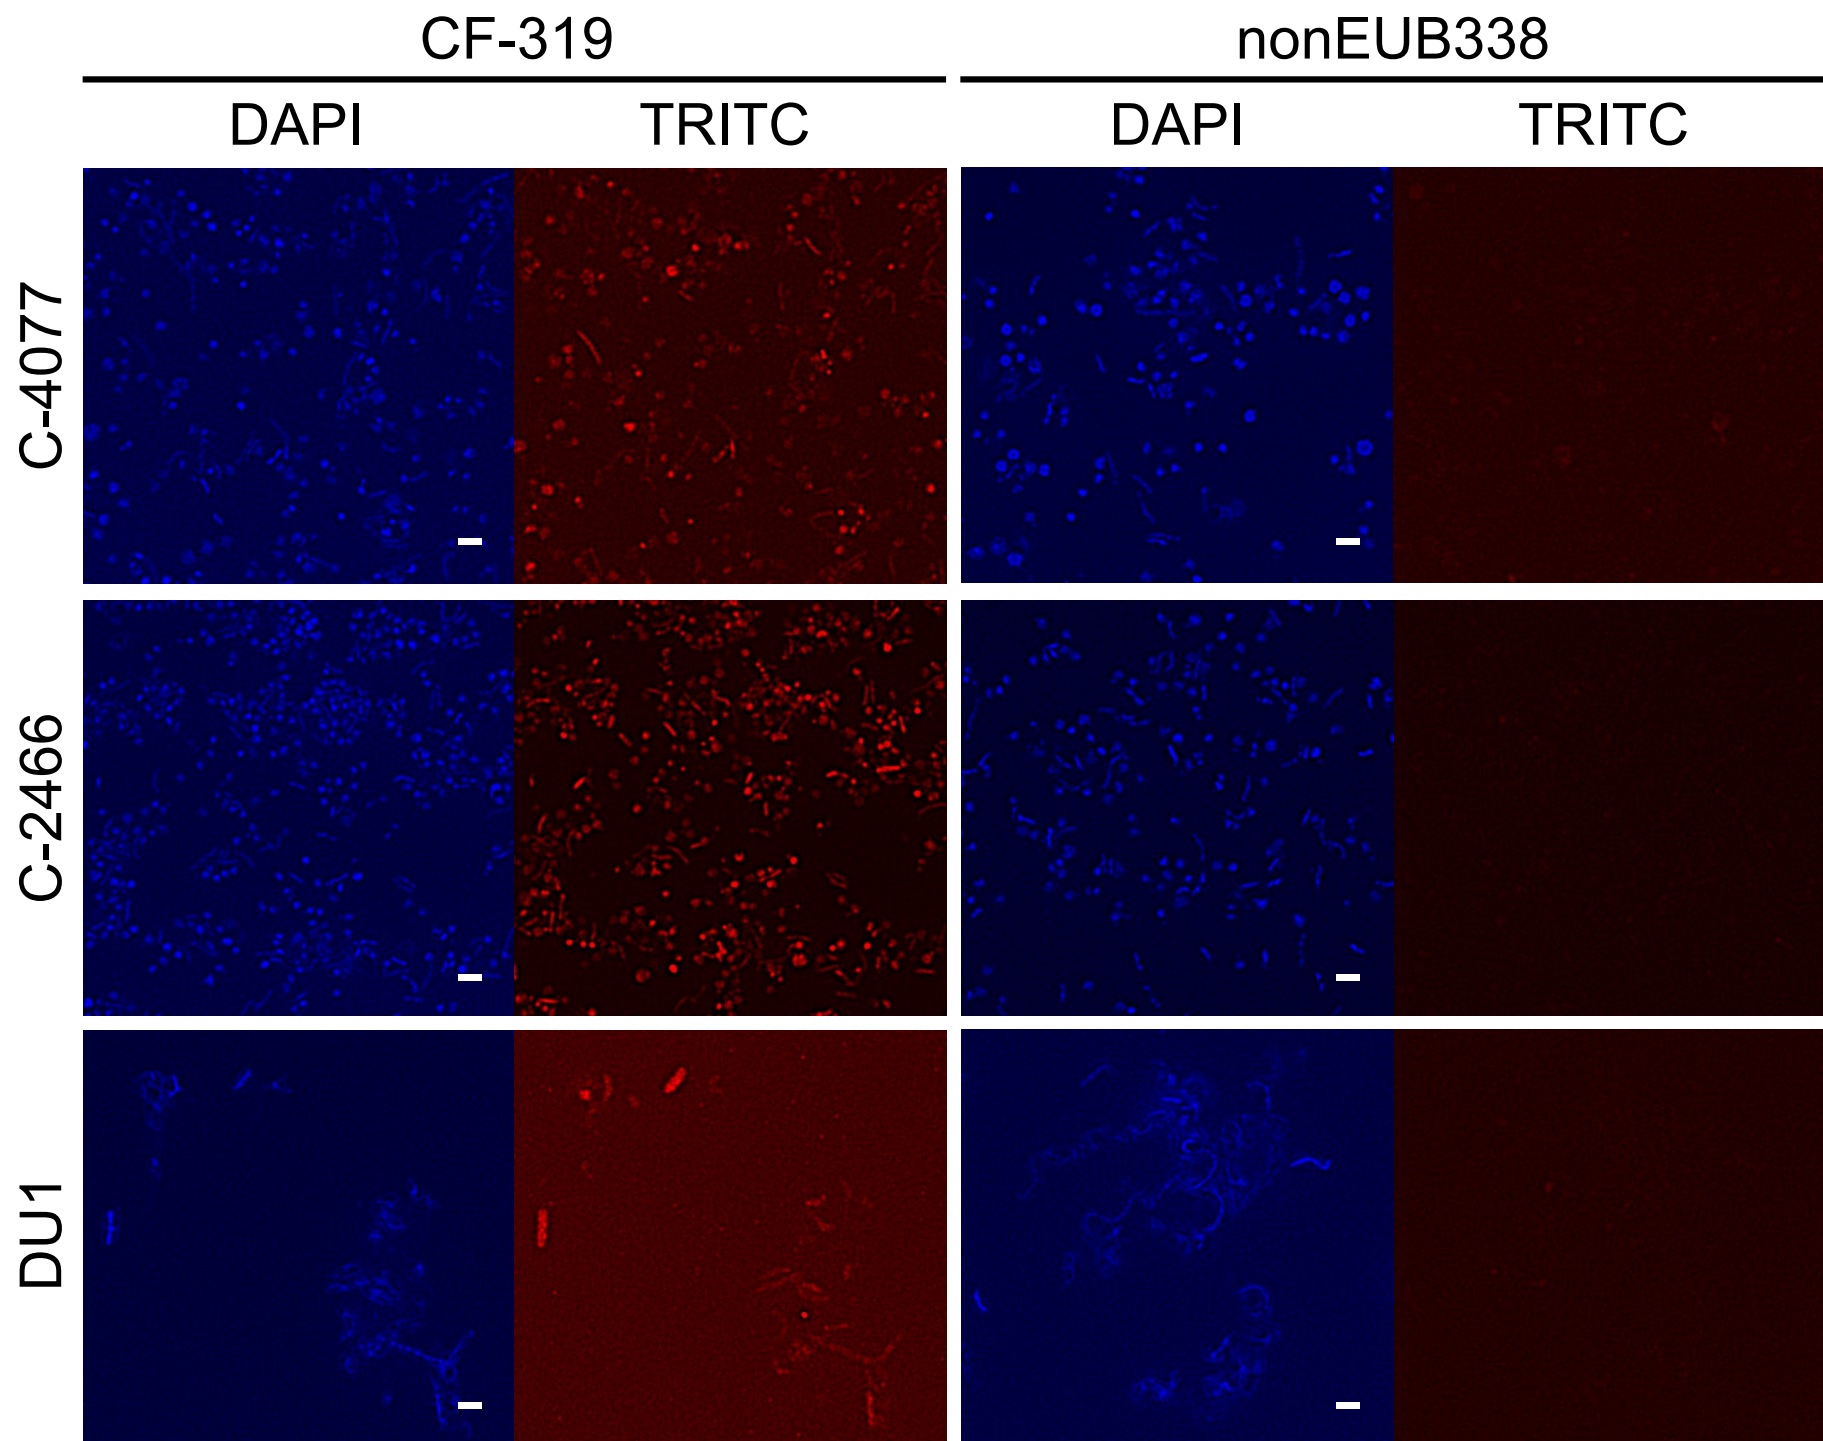

**Figure S3. Fluorescence *in situ* hybridization (FISH) analysis of pigmented bacteria.**

DAPI and Cy3 fluorescence were detected using a DAPI filter (ex: 360/40 nm, em: 460/50 nm, dichroic: 400 nm) or a TRITC filter (ex: 545/25 nm, em: 605/70 nm, dichroic: 565 nm), respectively. Bacterial samples were hybridized with CF319a/b (left panel) and NonEUB338 (right panel) probes labeled with Cy3. Scale bars are 2  $\mu$ m.

NIES-4077

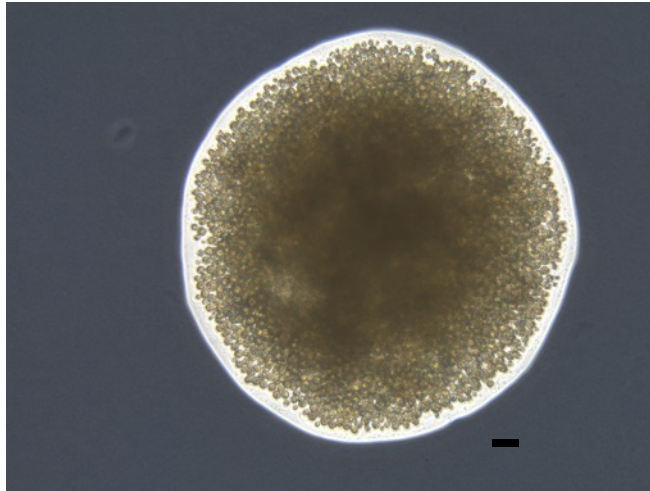

CCMP2466

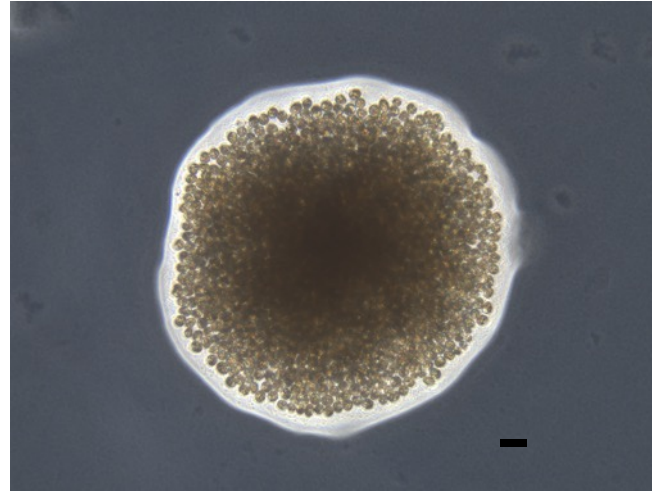

**Figure S4. Colonies of NIES-4077 and CCMP2466 on f/2 agar medium containing KAS-antibiotics**

NIES-4077 and CCMP2466 formed colonies on f/2 agar medium containing KAS-antibiotics and secreted an extracellular matrix (ECM) around the periphery of colonies. Colonies were observed using an all-in-one fluorescence microscope (BZ-X800, KEYENCE, Osaka, Japan). The scale bar is 30  $\mu\text{m}$ .

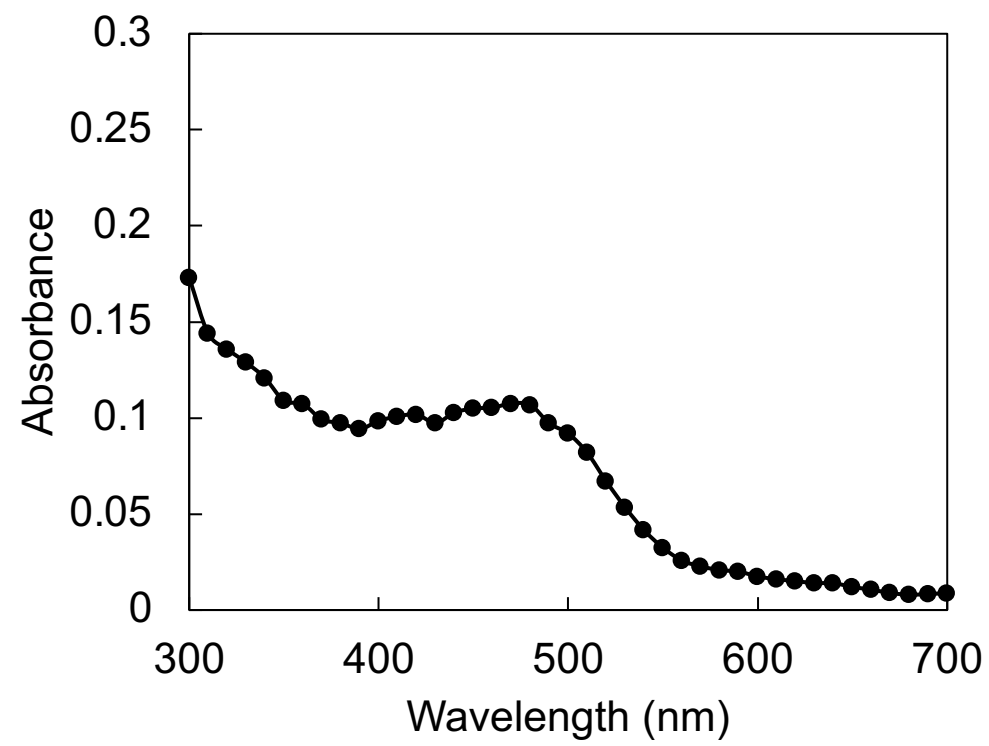

**Figure S5. Absorption spectrum of an ethanol extract of DU1**
